# Supplementary material for: Association between incident falls and subsequent fractures in patients attending the fracture liaison service after an index fracture: a 3-year prospective observational cohort study
Source: HighWire-hosted journal article supplement (doi:10.1136/bmjopen-2021-058983), 2022-07-01
Supplement: bmjopen-2021-058983supp001_data_supplement.pdf [file bmjopen-2021-058983supp001_data_supplement.pdf]

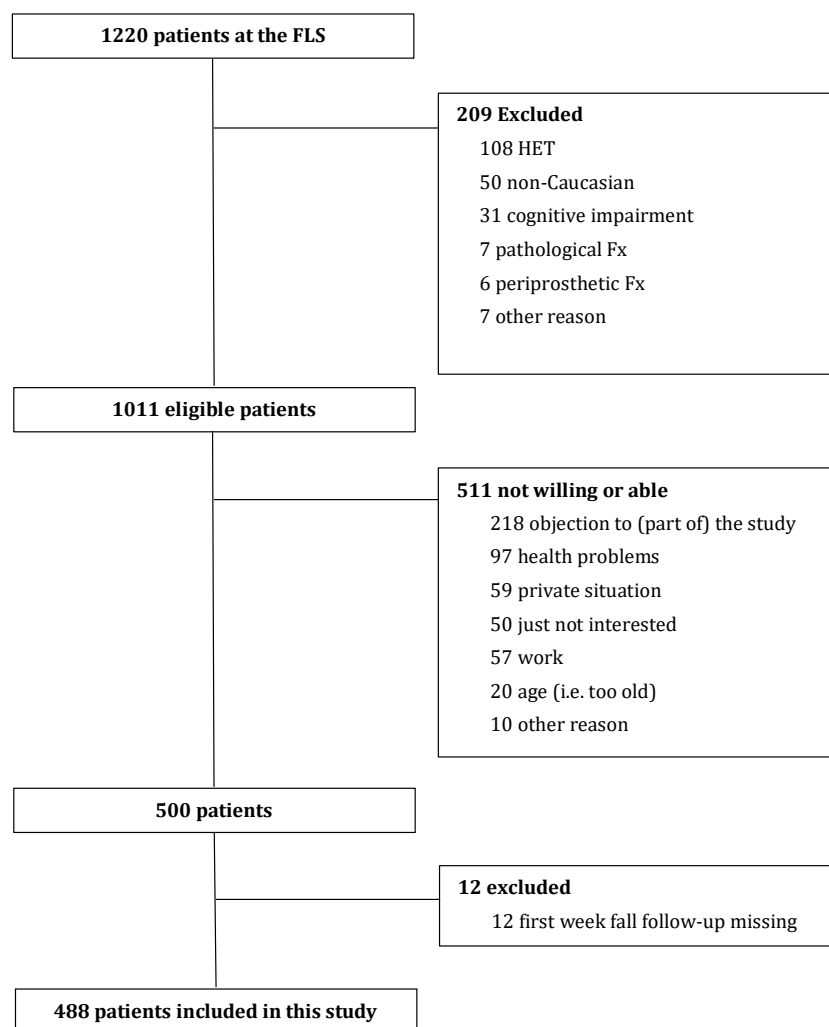

**Supplementary Figure 1.** Patient selection. Abbreviations: HET, high-energy trauma fractures; Fx, fracture.
